# Supplementary material for: Effects of Oscillation Amplitude Variations on QCM Response to Microspheres of Different Sizes
Source: MDPI journal article supplement (doi:10.3390/s23125682), 2023-06-18
Supplement: s1 [file s1]

## Supplementary Materials

# Effects of Oscillation Amplitude Variations on QCM Response to Microspheres of Different Sizes

Emiliano Zampetti <sup>1,\*</sup>, Maria Aurora Mancuso <sup>1</sup>, Fabrizio Dirri <sup>2</sup>, Ernesto Palomba <sup>2</sup>, Paolo Papa <sup>1</sup>, Alessandro Capocecera <sup>1</sup>, Andrea Bearzotti <sup>1</sup>, Antonella Macagnano <sup>1</sup> and Diego Scaccabarozzi <sup>3</sup>

<sup>1</sup> Institute of Atmospheric Pollution Research–National Research Council (IIA-CNR), Research Area of Rome 1, Strada Provinciale 35d, 9-00010 Montelibretti, Italy; aurora.mancuso@iia.cnr.it (M.A.M.); p.papa@iia.cnr.it (P.P.); a.capocecera@iia.cnr.it (A.C.); a.bearzotti@iia.cnr.it (A.B.); antonella.macagnano@cnr.it (A.M.)

<sup>2</sup> National Institute for Astrophysics INAF-IAPS, Via del Fosso del Cavaliere 100, 00133 Rome, Italy; fabrizio.dirri@inaf.it (F.D.); ernesto.palomba@inaf.it (E.P.)

<sup>3</sup> Mechanical Department, Polytechnic University of Milan, Via La Masa 1, 20156 Milano, Italy; diego.scaccabarozzi@polimi.it

\* Correspondence: e.zampetti@iia.cnr.it

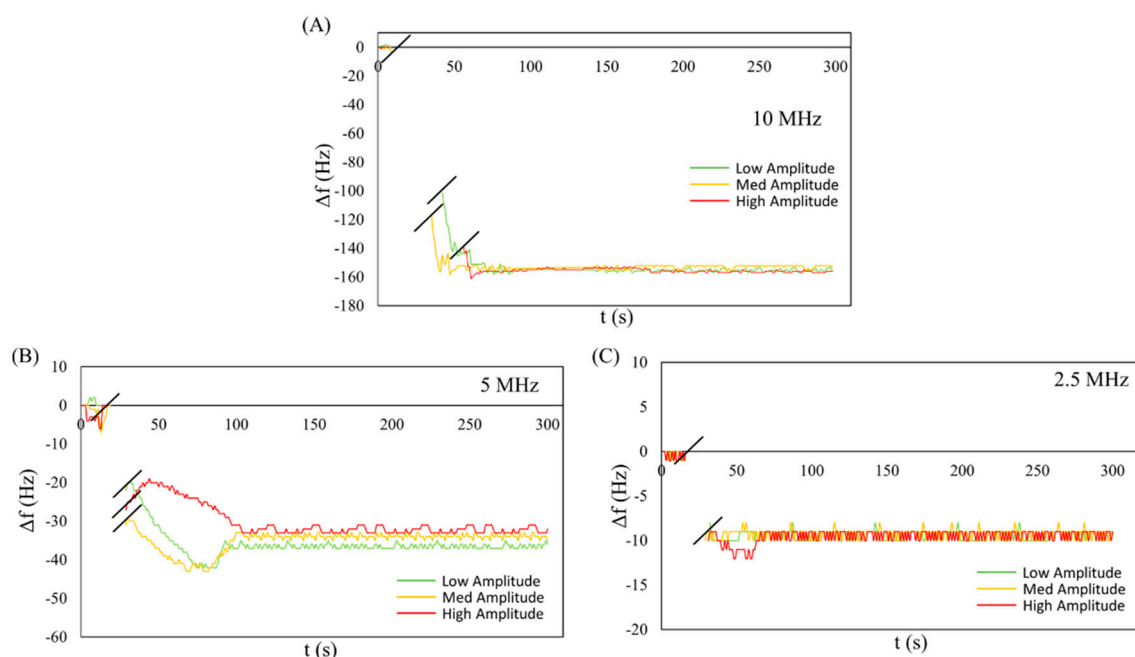

**Figure S1.** Chronograms for PVP solution on 10 MHz (A), 5 MHz (B), and 2.5 MHz (C) QCMs using different amplitude (low, medium, and high).

**Table S1.** The table resumes the results obtained for PVP<sub>sol</sub> changing amplitude (high, medium, low) on different QCMs (10, 5, 2.5 MHz).

| QCM (MHz) | Amplitude | $ \Delta f $ (Hz) | $\Delta m$ (ng) | $\Delta m_e$ (ng) |
|-----------|-----------|-------------------|-----------------|-------------------|
| 10        | High      | 157               | 196.3           | $\pm 9.3$         |
|           | Medium    | 149               | 191.3           |                   |
|           | Low       | 156               | 195.1           |                   |
| 5         | High      | 37                | 164.4           | $\pm 20.6$        |
|           | Medium    | 34                | 169.3           |                   |
|           | Low       | 33                | 184.3           |                   |
| 2.5       | High      | 10                | 201.3           | $\pm 66.0$        |
|           | Medium    | 9                 | 181.2           |                   |
|           | Low       | 9                 | 181.2           |                   |

$\Delta m_e$  is the experimental mass error.

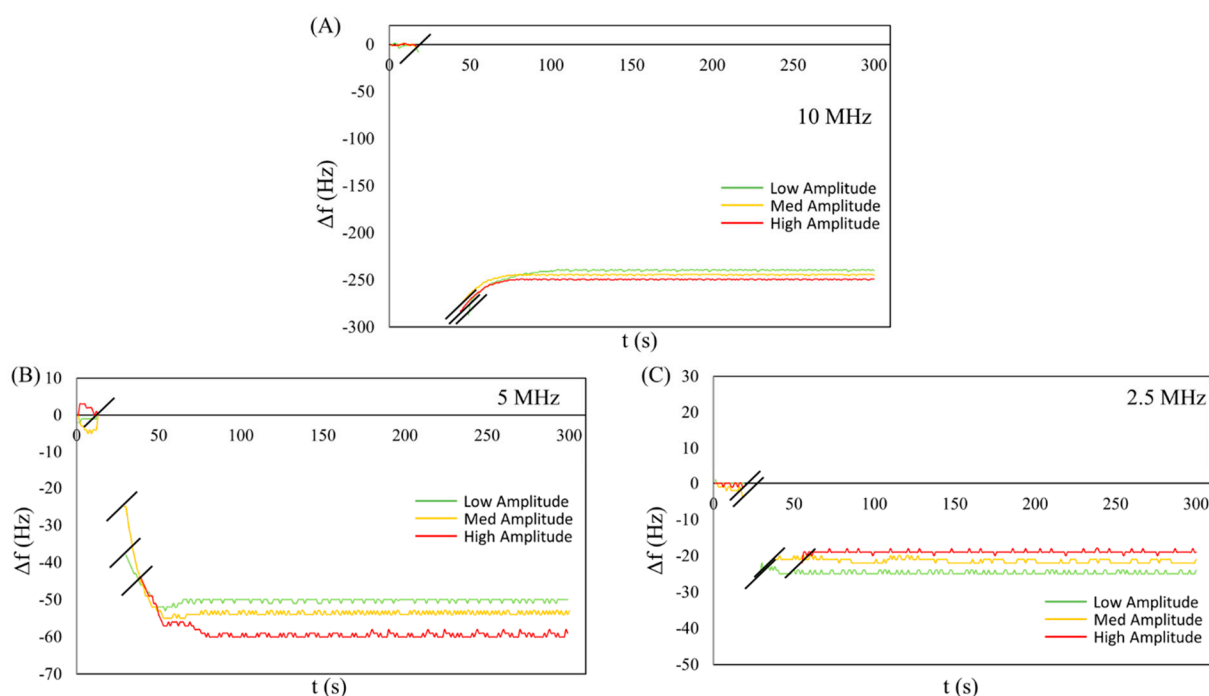**Figure S2.** (MS2) 2  $\mu$ m microspheres dispersions chronograms on 10 MHz (A), 5 MHz (B), 2.5 MHz (C) QCMs with different oscillation amplitudes.**Table S2.** Results obtained for MS<sub>2</sub> modulating driving force (high, medium, low) on different QCMs (10, 5, 2.5 MHz).

| QCM (MHz) | Amplitude | $ \Delta f $ (Hz) |
|-----------|-----------|-------------------|
| 10        | High      | 249               |
|           | Medium    | 245               |
|           | Low       | 240               |
| 5         | High      | 58                |
|           | Medium    | 54                |
|           | Low       | 50                |
| 2.5       | High      | 19                |
|           | Medium    | 21                |
|           | Low       | 25                |

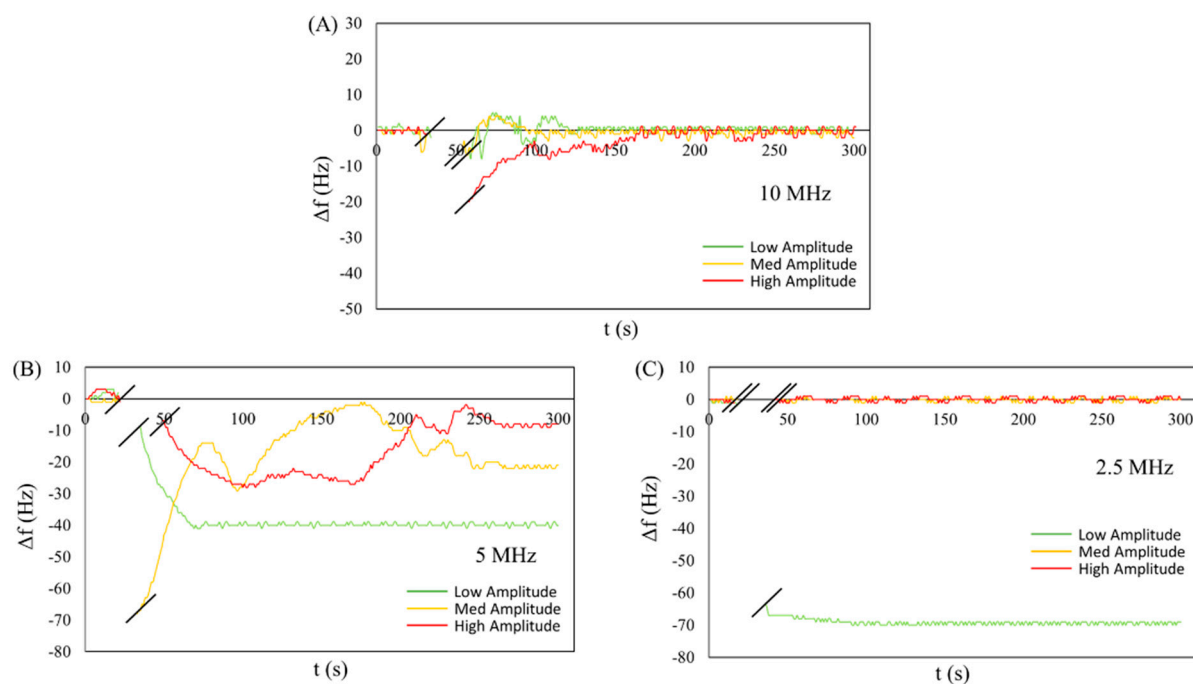

**Figure S3.** (MS10) 10  $\mu\text{m}$  microspheres dispersions chronograms on 10 MHz (A), 5 MHz (B), 2.5 MHz (C) QCMs with different oscillation amplitudes.

**Table S3.** Results obtained for MS<sub>10</sub> modulating driving force (high, medium, low) on different QCMs (10, 5, 2.5 MHz).

| QCM (MHz) | Driving force | $ \Delta f $ (Hz) |
|-----------|---------------|-------------------|
| 10        | High          | -                 |
|           | Medium        | -                 |
|           | Low           | -                 |
| 5         | High          | 9                 |
|           | Medium        | 23                |
|           | Low           | 40                |
| 2.5       | High          | -                 |
|           | Medium        | -                 |
|           | Low           | 69                |

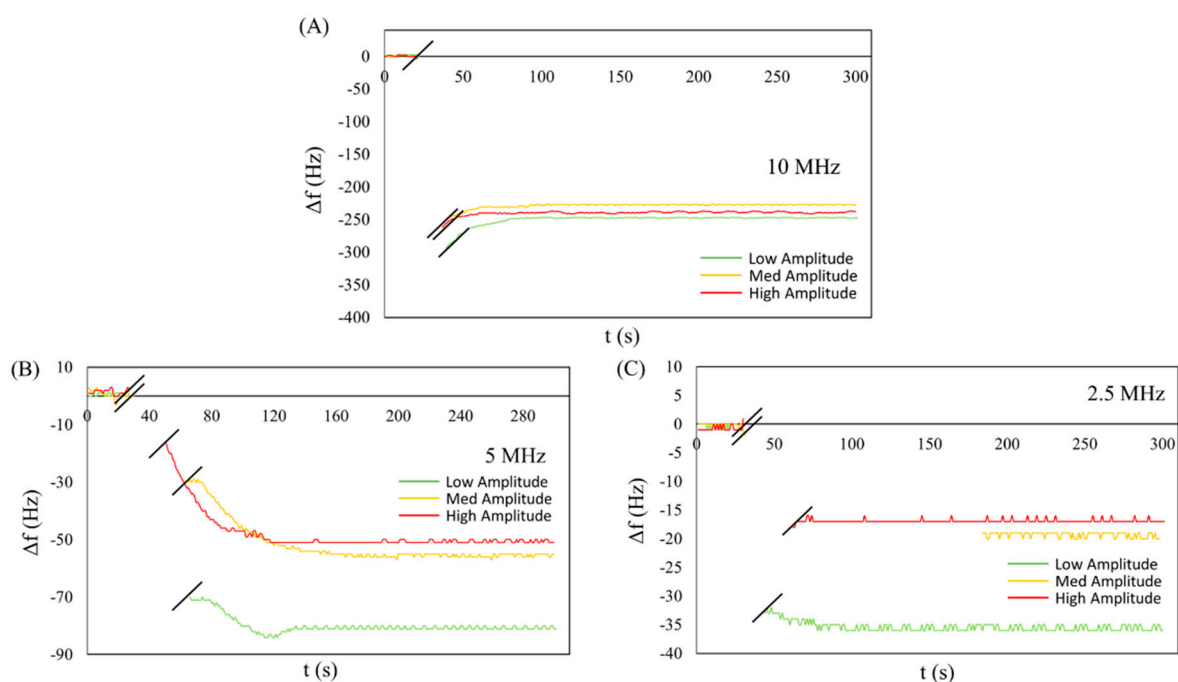

**Figure S4.** Chronograms of MSMIX (2 e 10  $\mu\text{m}$ ) in EtOH on 10 MHz (A), 5 MHz (B), 2.5 MHz (C) QCMs with different oscillation amplitudes.

**Table S4.** The table resumes frequency variations for MS<sub>MIX</sub> on different QCMs (10, 5, 2.5 MHz) and oscillation amplitudes (high, medium, low).

| QCM (MHz) | Driving force | $ \Delta f $ (Hz) |
|-----------|---------------|-------------------|
| 10        | High          | 239               |
|           | Medium        | 227               |
|           | Low           | 247               |
| 5         | High          | 36                |
|           | Medium        | 56                |
|           | Low           | 82                |
| 2.5       | High          | 16                |
|           | Medium        | 18                |
|           | Low           | 37                |
